## ANESTHESIOLOGY

# Persistent Postoperative Opioid Prescription Fulfillment and Peripheral Nerve Blocks for Ambulatory Shoulder Surgery: A Retrospective Cohort Study

Gavin M. Hamilton, M.D., M.Sc., Sarah Tierney, M.D., B.Sc.,  
Reva Ramlogan, M.D., B.Sc.,  
Colin J. L. McCartney, M.B.Ch.B., Ph.D.,  
Lisa A. Bromley, M.D., Daniel I. McIsaac, M.D., M.P.H.

*ANESTHESIOLOGY* 2021; 135:829–41

## EDITOR'S PERSPECTIVE

### What We Already Know about This Topic

- Peripheral nerve blocks for ambulatory shoulder surgery reduce early postoperative pain
- Persistent opioid prescription fulfillment after ambulatory shoulder surgery is common, with more than 10% of previously opioid-naïve patients still requiring opioid prescriptions 180 days after surgery

### What This Article Tells Us That Is New

- Among 48,523 patients undergoing ambulatory shoulder surgery in Ontario, Canada, between 2012 and 2017, 16% of patients receiving a nerve block and 17% of patients without a nerve block went on to demonstrate persistent postoperative opioid prescription fulfillment
- This statistically significant difference has questionable clinical significance, and was not reproduced in a variety of sensitivity analyses
- There is no consistent association between the receipt of a peripheral nerve block and a lower risk of persistent opioid prescription fulfillment after ambulatory shoulder surgery

## ABSTRACT

**Background:** There is need to identify perioperative interventions that decrease chronic opioid use. The authors hypothesized that receipt of a peripheral nerve block would be associated with a lower incidence of persistent postoperative opioid prescription fulfillment.

**Methods:** This was a retrospective population-based cohort study examining ambulatory shoulder surgery patients in Ontario, Canada. The main outcome measure was persistent postoperative opioid prescription fulfillment. In opioid-naïve patients (no opioid prescription fulfillment in 90 days preoperatively), this was present if an individual fulfilled an opioid prescription of at least a 60-day supply during postoperative days 90 to 365. In opioid-exposed (less than 60 mg oral morphine equivalent dose per day within 90 days preoperatively) or opioid-tolerant (60 mg oral morphine equivalent dose per day or above within 90 days preoperatively) patients, this was classified as present if an individual experienced any increase in opioid prescription fulfillment from postoperative day 90 to 365 relative to their baseline use before surgery. The authors' exposure was the receipt of a peripheral nerve block.

**Results:** The authors identified 48,523 people who underwent elective shoulder surgery from July 1, 2012, to December 31, 2017, at one of 118 Ontario hospitals. There were 8,229 (17%) patients who had persistent postoperative opioid prescription fulfillment. Of those who received a peripheral nerve block, 5,008 (16%) went on to persistent postoperative opioid prescription fulfillment compared to 3,221 (18%) patients who did not (adjusted odds ratio, 0.90; 95% CI, 0.83 to 0.97;  $P = 0.007$ ). This statistically significant observation was not reproduced in a coarsened exact matching sensitivity analysis (adjusted odds ratio, 0.85; 95% CI, 0.71 to 1.02;  $P = 0.087$ ) or several other subgroup and sensitivity analyses.

**Conclusions:** This retrospective analysis found no association between receipt of a peripheral nerve block and a lower incidence of persistent postoperative opioid prescription fulfillment in ambulatory shoulder surgery patients.

(*ANESTHESIOLOGY* 2021; 135:829–41)

Chronic opioid use has resulted in serious morbidity, mortality, and economic cost.<sup>1,2</sup> Recent publications clearly identify that opioid prescriptions from acute care visits contribute to chronic opioid use.<sup>3,4</sup> Specifically, prescribing opioids at hospital discharge to opioid-naïve patients may increase the odds of chronic opioid use 1 yr after discharge fivefold.<sup>5</sup> This is of particular concern in the perioperative population, as several studies demonstrate that surgery is associated with an increased risk of persistent postoperative opioid utilization.<sup>6,7</sup> Depending on the definition of persistent postoperative opioid utilization

This article has been selected for the Anesthesiology CME Program. Learning objectives and disclosure and ordering information can be found in the CME section at the front of this issue. This article is featured in "This Month in Anesthesiology," page A1. Supplemental Digital Content is available for this article. Direct URL citations appear in the printed text and are available in both the HTML and PDF versions of this article. Links to the digital files are provided in the HTML text of this article on the Journal's Web site ([www.anesthesiology.org](http://www.anesthesiology.org)). This article has an audio podcast. This article has a visual abstract available in the online version.

Submitted for publication October 19, 2020. Accepted for publication August 4, 2021. Published online first on September 15, 2021. From the Department of Anesthesiology and Pain Medicine (G.M.H., S.T., R.R., C.J.L.M., D.I.M.), School of Epidemiology and Public Health (D.I.M.), and Department of Family Medicine (L.A.B.), University of Ottawa, Ottawa, Ontario, Canada; and Ottawa Hospital Research Institute, Ottawa, Ontario, Canada (G.M.H., C.J.L.M., D.I.M.).

Copyright © 2021, the American Society of Anesthesiologists. All Rights Reserved. *Anesthesiology* 2021; 135:829–41. DOI: 10.1097/ALN.0000000000003962

used and the surgical population studied, the incidence of persistent opioid use after elective surgery varies widely.<sup>6,8</sup> Given concerns related to persistent opioid use in surgical patients, there is a need to identify perioperative interventions that can decrease risks related to postoperative opioid prescribing and chronic opioid use.

Ambulatory orthopedic surgery is common, and variations in perioperative anesthetic and analgesic care for orthopedic patients is well documented. Shoulder surgery is one of the most painful ambulatory surgeries commonly performed and is associated with a threefold increase in unplanned hospital admissions compared with other common orthopedic procedures.<sup>9,10</sup> Peripheral nerve blocks (e.g., local anesthetic injected around a specific nerve bundle) reduce early postoperative pain to a clinically important extent; however, the proportion of patients who receive peripheral nerve blocks in elective shoulder surgery is variable (15 to 52%).<sup>11–13</sup> This may be due to a variety of factors, including a lack of equipment and expertise in some centers, as well as substantial uncertainty about the medium- and long-term effects of peripheral nerve blocks in shoulder surgery.<sup>14</sup> To our knowledge, there has been one study that has examined peripheral nerve blocks and persistent opioid use in ambulatory shoulder surgery.<sup>15</sup> Mueller *et al.*<sup>15</sup> found no association between persistent opioid use and the receipt of a peripheral nerve block in patients undergoing shoulder arthroplasty, but this study used unvalidated billing codes in a homogenous population of patients with private health insurance (*i.e.*, age less than 65 yr). Despite guidelines that recommend use of peripheral nerve blocks to reduce postoperative opioid use, whether improved early analgesia with peripheral nerve blocks results in lower rates of persistent opioid use is unknown due to the paucity of evidence in this area.<sup>16,17</sup>

Given the lack of evidence, and the important public health implications, our primary objective was to estimate the population-level association between peripheral nerve blocks and persistent postoperative opioid prescription fulfillment in the first postoperative year after ambulatory shoulder surgery. We hypothesized that the receipt of a peripheral nerve block would be associated with a lower incidence of persistent postoperative opioid prescription fulfillment among patients undergoing ambulatory surgery. Our secondary objective was to evaluate whether the degree of preoperative opioid prescription fulfillment modified the association between receipt of peripheral nerve block and persistent postoperative opioid prescription fulfillment.

## Materials and Methods

### Study Design, Setting, and Data Sources

We conducted a population-based cohort study in Canada's most populous province (Ontario; more than 13 million inhabitants), which provides universal physician and hospital health insurance coverage. Healthcare data in Ontario

are collected using standardized methods and are stored at ICES (Toronto, Ontario, Canada), an independent research institute. Datasets used for the study included the Same Day Surgery Database, which captures all planned ambulatory surgeries; the Discharge Abstract Database, which captures all inpatient hospitalizations; the Ontario Health Insurance Plan database, which captures physician service claims; the National Ambulatory Care Reporting System, which captures details of all emergency and outpatient care; the Continuing Care Reporting System, which records details of long-term and respite care; the Narcotic Monitoring System, which captures all prescription opioid drug claims for Ontario residents; and the ICES Physician Database, which houses information on physician specialty, demographics, training, and workload. Because data used for this study were routinely collected and deidentified, it was legally exempt from research ethics review.

### Participants

We identified all Ontario residents aged 18 yr and older who underwent elective ambulatory shoulder surgery. Participants were identified using the Same Day Surgery Database through application of previously studied Canadian Classification of Interventions codes to identify the following shoulder surgeries: shoulder arthroscopy, arthroplasty synthetic repair, implantation of internal device shoulder joint, repair of recurrent dislocation, other shoulder repair, shoulder arthrotomy, division of joint capsule, lining or cartilage shoulder, synovectomy shoulder, other local excision or destruction of shoulder joint, and other excision of joint (shoulder). The study period extended from July 1, 2012, to December 31, 2017 (latest complete data at the time of cohort creation), and we created a patient-level analytic data set by including only the first surgery for any participant in the study period. The start time was chosen to coincide with the introduction of the Narcotic Monitoring System tracking system for opioid use in Ontario.

Given the important postulated role of preoperative opioid use, we defined preoperative utilization using modified preoperative "O-NET" opioid exposure criteria (opioid-naïve [N], no history of opioid use in the 90 days before surgery; opioid-exposed [E], any opioid exposure less than 60 mg morphine equivalent dose per day within 90 days preoperatively; opioid-tolerant [T], a dose of 60 mg morphine equivalent dose per day or above in the 90 days before surgery).<sup>6</sup> We modified the time frame of the opioid tolerant definition timeframe in the consensus guideline from 7 days to 90 days (1) to ensure a discrete and mutually exclusive definition and (2) to avoid misclassification of patients who did not fill a prescription in the 7 days before the surgery, but were still prescribed a greater than 60 mg morphine daily dose. The morphine equivalent dose per day was calculated by taking the sum total of opioid prescriptions filled during the 90-day time frame, converting to oral morphine equivalents, and

dividing the sum total oral morphine equivalents by the number of days (e.g., 90 days).

## Exposure

We identified peripheral nerve blocks on the day of surgery through use of validated Ontario Health Insurance Plan physician billing codes (G260–major plexus block, G060–major nerve block, G061–minor nerve block, or G279–percutaneous nerve block catheter for continuous infusion analgesia), which have been validated against a clinical reference to demonstrate their accuracy (positive likelihood ratio, 16.83; negative likelihood ratio, 0.03; sensitivity, 97%; specificity, 94%) for correctly identifying the true presence (or absence) of a peripheral nerve blocks.<sup>14</sup>

## Outcomes

Our primary outcome was persistent postoperative opioid prescription fulfillment, with data obtained from the Narcotic Monitoring System. The actual consumption of opioids prescribed is not captured in our dataset. We defined persistent postoperative opioid prescription fulfillment using recently published consensus guidelines.<sup>6</sup> Specifically, for opioid-naïve patients, persistent postoperative opioid prescription fulfillment was classified as a fulfillment of an opioid prescription if an individual fulfilled an opioid prescription of at least a 60-day supply during postoperative days 90 to 365. For preoperative opioid-exposed or -tolerant individuals, persistent postoperative opioid prescription fulfillment is classified as a fulfillment of an opioid prescription if an individual experienced any increase in opioid prescription fulfillment from postoperative days 90 to 365 relative to their baseline use in the 90 days before surgery.<sup>6</sup> This was operationalized by comparing (A) the mean daily morphine equivalents in the 90 days before the surgery to (B) the mean daily morphine equivalent in day 90 to 360 after surgery. If B was greater than A, we would record the patient as having persistent postoperative opioid prescription fulfillment. Our secondary outcomes were fulfillment of any postoperative opioid prescription within 14 days of the index surgery (a binary variable), the quantity of opioids prescribed (oral morphine equivalents in milligrams per day) within 14 days of surgery,<sup>18</sup> and the total quantity of opioids prescribed in the year after surgery (oral morphine equivalents in milligrams per day). These secondary outcomes were also captured from the Narcotic Monitoring System.

## Covariates

Patient demographics, comorbidities, preoperative opioid prescription fulfillment, and preoperative patterns of healthcare resource use are likely to confound the association between the receipt of a peripheral nerve block and persistent opioid prescription fulfillment. Therefore, we obtained detailed baseline data on all participants, including

age; sex; rural (*vs.* urban) residence; socioeconomic status; American Society of Anesthesiologists (Schaumburg, Illinois) Physical Status score; baseline 1-yr mortality risk using the Johns Hopkins Adjusted Clinical Groups score (which demonstrates excellent discrimination [c-statistic 0.92] and calibration)<sup>19</sup>; baseline acute care utilization patterns (number of acute care hospitalizations and number of emergency department visits in the year before surgery); and predicted healthcare utilization based on the Adjusted Clinical Groups Resource Utilization Band,<sup>20</sup> which accounts for patterns of preoperative inpatient and outpatient health resource use. For specific patient comorbidities, we used validated measures identifying a history of asthma,<sup>21</sup> chronic obstructive pulmonary disease,<sup>22</sup> diabetes mellitus,<sup>23</sup> acute coronary syndrome,<sup>24</sup> heart failure,<sup>25</sup> and hypertension.<sup>26</sup> Elixhauser comorbidities<sup>27</sup> were used for all other comorbidities without validated measures.

## Sample Size

This was a population-based study; therefore, we included all eligible members of the Ontario population. No formal statistical power calculation was conducted.

## Missing Data

Data were missing for 0.1% of participants for the covariate rural *versus* urban residence, 0.21% of participants for the covariate neighborhood income, and 7.0% of institutional data (hospitals). We imputed these covariates with the central measure of tendency (for neighborhood income third) or most common value (for rural *vs.* urban residence). For missing institution, we inputted a missing value (e.g., 9,999) so that patients with a missing institution would be clustered together. We then conducted a sensitivity analysis in our cohort without the imputed institution to see if our imputation assumption impacted the results.

## Statistical Analysis

The study protocol was registered with the Center for Open Science (Charlottesville, Virginia; registration DOI: 10.17605/OSF.IO/R65N7), and our full analytic plan was determined *a priori*. The dataset was created, manipulated, and analyzed using Stata version 15.1 (StataCorp LLC, USA). Baseline covariate data were compared between those with and without a peripheral nerve block using absolute standardized differences; values greater than 0.10 were considered to represent substantial imbalance.<sup>28</sup>

To estimate the association of receipt of peripheral nerve blocks with the likelihood of persistent opioid prescription fulfillment, we calculated unadjusted and adjusted effect measures. Our primary approach to adjusted analyses was to use multivariable regression models that accounted for clustering of individuals within hospitals (the highest level in our data hierarchy) using generalized estimating

equation methods. Adjusted regression models included the exposure of interest (peripheral nerve block; binary), as well as preoperative opioid prescription fulfillment (categorical; naive, exposed, or tolerant), age (restricted cubic spline with five knots), sex (binary), neighborhood income quintile (five-level categorical variable), rurality (binary), surgical procedure and technique (categorical; full seven-digit Canadian Classification of Interventions classification), anesthetic (binary; general anesthesia *vs.* sedation), asthma (binary), chronic obstructive pulmonary disease (binary), diabetes mellitus (binary), acute coronary syndrome binary (binary), heart failure (binary), hypertension (binary), each Elixhauser comorbidity (binary), year of surgery (six-level categorical), resource utilization band (six-level categorical), baseline 1-year mortality risk using the Johns Hopkins Adjusted Clinical Groups score (linear, as in its derivation),<sup>19</sup> previous acute hospitalizations (binary), and previous emergency department visits (binary). As per our protocol, we attempted to use a log binomial model as the incidence of our outcome was greater than 10%, but our model did not converge, so we moved to a logistic regression framework to generate adjusted odds ratios.<sup>29</sup>

For our secondary outcomes, the analysis of initial fulfillment of a postoperative opioid prescription between the two dichotomous peripheral nerve block exposure levels (yes/no) was conducted in the same manner as the primary analysis. The continuous outcome of oral morphine equivalents initially prescribed and over the first year was analyzed using linear regression. Since there was significant dispersion of the oral morphine equivalents data (right-skewed distribution), as per protocol, we went on to analyze oral morphine equivalents using negative binomial regression adjusting for the same covariates as the primary analysis.

### Sensitivity Analysis

To test the robustness of our primary analysis, we utilized an analysis based on matching (as opposed to regression) to control for confounders. Specifically, we used coarsened exact matching, a type of monotonic imbalance bounding used to preprocess the data to create two groups (peripheral nerve block *vs.* no peripheral nerve block) that are identical within coarsened ranges of each variable. Compared to propensity score matching, which matches individuals on average across covariates, coarsened exact matching is less model-dependent and lowers bias (by removing heterogeneity)<sup>30</sup> as it requires fewer assumptions (such as proper specification of the propensity score model).<sup>31</sup> Our coarsened exact matching model matched on all covariates that were included in our primary regression analysis, including an exact match on hospital. It was conducted in a 1:many matching method per defined methods.<sup>30</sup> See Supplemental Digital Content 1 (<http://links.lww.com/ALN/C677>) for a full description of coarsening, including the formal pre-specification of the matching in the model. The matched

cohort was then analyzed using a logistic regression framework to generate adjusted odds ratios. Adjusted absolute risk differences and adjusted number needed to treat values with 95% CI were also calculated based on the coarsened exact matching matched cohort.

### Subgroup Analyses

The primary model was repeated within the three subgroups of preoperative opioid prescription fulfillment (naive, exposed, tolerant) to examine preoperative opioid prescription fulfillment and persistent postoperative opioid prescription fulfillment. Furthermore, we compared the subset of patients who had a continuous catheter, instead of a single shot block (recoding the exposure as a three-level categorical variable: no peripheral nerve block [reference], single shot peripheral nerve block, peripheral nerve block with catheter). We also tested for presence of effect modification by adding the multiplicative interaction terms to the primary outcome model, (1) peripheral nerve block  $\times$  sex, (2) peripheral nerve block  $\times$  depression, and (3) peripheral nerve block  $\times$  drug abuse, as these variables are known risk factors for chronic opioid use.<sup>6</sup>

### Post Hoc and Reviewer-requested Sensitivity Analyses

To understand the importance of our outcome definition, we conducted a *post hoc* analysis using another common definition of persistent postoperative opioid prescription fulfillment: more than 1 opioid prescription within 1 to 90 days after surgery and (a) more than 10 opioid prescriptions or (b) a 120-day supply of opioids within 91 to 365 days after surgery.<sup>32–34</sup> We examined the association of the receipt of peripheral nerve blocks with the likelihood of persistent opioid prescription fulfillment and calculated unadjusted and adjusted effect measures in a similar manner to our primary analysis using multivariable regression models using generalized estimating equation methods. The second definition was also examined with coarsened exact matching and analyzed using a logistic regression framework to generate adjusted odds ratios. To examine anesthetic technique, we compared the subset of patients who had sedation rather than a general anesthetic with their peripheral nerve block (recoding the exposure as a four-level categorical variable: general anesthesia [reference], peripheral nerve block and general anesthesia, peripheral nerve block and sedation, sedation and local infiltration). To examine type of shoulder surgery, we compared patients across a four-level surgery type categorical variable (total/partial arthroplasty [reference], arthroscopic procedure, open procedure, other procedure). Last, we also tested for presence of effect modification by preoperative opioid exposure status by adding the multiplicative interaction terms to the primary outcome model: (1) peripheral nerve block  $\times$  opioid exposure level (naive, exposed, tolerant), and (2) peripheral nerve block catheter  $\times$  opioid exposure level (naive, exposed, tolerant).



## Results

We identified 48,523 people who underwent shoulder surgery from July 1, 2012, to December 31, 2017, at one of 118 Ontario hospitals. Overall, 30,377 (63%) patients received a peripheral nerve block, and 18,146 (37%) patients did not (fig. 1). Out of those who received a peripheral nerve block, 1,369 (5%) patients had a peripheral nerve block catheter placed with their surgery. Patients receiving a peripheral nerve block were similar to patients who did not; 4 of 44 measured covariates had an absolute standardized difference greater than 10 (age, rurality, type of shoulder repair, year), and one absolute standardized difference exceeded 35 (anesthetic type). Complete patient characteristics by peripheral nerve block group are provided in table 1.

## Primary Outcome

In the total cohort, there were 8,229 (17%) patients who had persistent postoperative opioid prescription fulfillment. Of those that received a peripheral nerve block, 5,008 (16%) went on to have persistent postoperative opioid prescription fulfillment compared to 3,221 (18%) patients who did not receive a peripheral nerve block (unadjusted odds ratio = 0.91, 95% CI, 0.87 to 0.96;  $P < 0.001$ ). After multilevel multivariable adjustment, there continued to be a statistically significant association between receipt of a peripheral nerve block and reduced odds of persistent postoperative opioid prescription fulfillment (adjusted odds ratio = 0.90; 95% CI, 0.83 to 0.97;  $P = 0.007$ ). The fully adjusted regression model is presented in table 2.

## Secondary Outcomes

The majority of patients ( $n = 45,693$ ; 94%) filled a postoperative opioid prescription within 14 days of their index shoulder surgery. In patients who had receipt of a peripheral nerve block compared to those that did not, there was no statistically significant difference in the odds of any postoperative opioid prescription within 14 days of their surgery (adjusted odds ratio = 1.11; 95% CI, 0.92 to 1.34;  $P = 0.254$ ).

Using linear regression, the adjusted mean difference of oral morphine equivalents prescribed between patients who did or did not receive a peripheral nerve block in the 14 days after surgery was 1 mg (95% CI, -38 to 40;  $P = 0.945$ ). In the year after surgery (days 0 to 365), comparing patients who received a peripheral nerve block to those who did not, there was a statistically significant reduced adjusted mean difference in oral morphine equivalents (mean difference = -327 mg; 95% CI, -646 to 8;  $P = 0.045$ ). The overall adjusted mean oral morphine equivalent in patients that did not receive a peripheral nerve block was 3,106 mg (95% CI, 2,832 to 3,381) compared to 2,728 mg (95% CI, 2,481 to 2,976) in patients who received a peripheral nerve block. As oral morphine equivalents data was right skewed, we went on to test the robustness of this finding using negative binomial regression analysis to account for overdispersion of the oral morphine equivalents. There was no statistically significant association between peripheral nerve block receipt and receipt of oral morphine equivalents in the first 14 days after surgery (adjusted relative risk = 1.02; 95% CI, 0.95 to 1.09;  $P = 0.665$ ) or 365 days after surgery

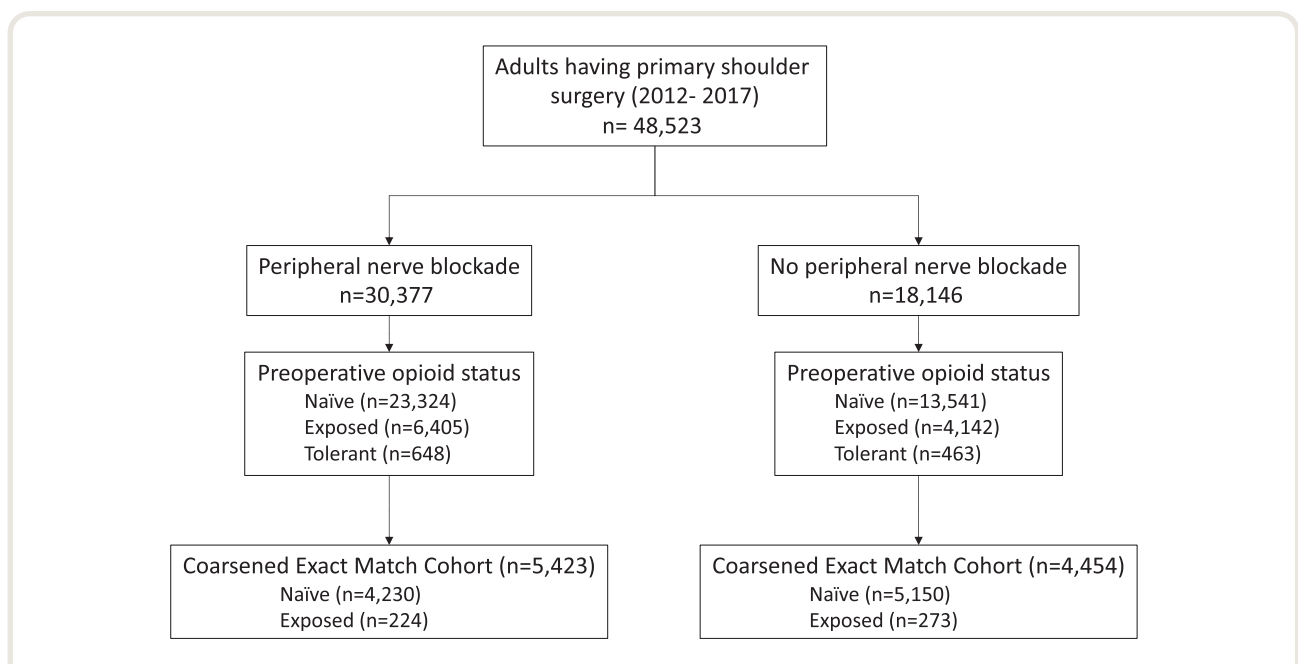

**Fig. 1.** Study flow diagram of the analytical dataset depicting the full cohort and the coarsened exact match analysis cohort.

between patients who did or did not receive a peripheral nerve block (adjusted relative risk = 0.99; 95% CI, 0.92 to 1.08;  $P = 0.886$ ).

### Subgroup Analyses

In our cohort, 36,865 (76%) of patients were opioid-naïve, 10,547 (22%) of patients were opioid-exposed, and 1,111 (2%) of patients were opioid-tolerant. Within the opioid-naïve preoperative exposure group ( $n = 36,865$ ), the receipt of a peripheral nerve block was not statistically significantly associated with persistent postoperative opioid prescription fulfillment (adjusted odds ratio = 0.95; 95% CI, 0.86 to 1.04;  $P = 0.266$ ). In the opioid-exposed group ( $n = 10,547$ ), receipt of a peripheral nerve block was associated with a reduced odds of persistent postoperative opioid

prescription fulfillment (adjusted odds ratio = 0.86; 95% CI, 0.77 to 0.96;  $P = 0.006$ ), whereas the opioid tolerant group ( $n = 1,111$ ) was not (adjusted odds ratio = 1.03; 95% CI, 0.78 to 1.36;  $P = 0.809$ ; table 3).

### Sensitivity Analysis

The coarsened exact match resulted in a creation of a matched cohort of 9,877 people with a peripheral nerve block, and people without a peripheral nerve block (20% of total cohort; see Supplemental Digital Content 2, <http://links.lww.com/ALN/C678>, for full characteristics of the coarsened exact matched cohort). Within the matched cohort, 9,380 (95%) were opioid-naïve, 497 (5%) were opioid-exposed, and no patients were opioid-tolerant (due to the small sample of opioid-tolerant patients in

**Table 1.** Characteristics of the Study Cohort ( $n = 48,523$ )

|                                             | No Peripheral Nerve Block ( $n = 18,146$ ) | Peripheral Nerve Block ( $n = 30,377$ ) | Absolute Standardized Difference |
|---------------------------------------------|--------------------------------------------|-----------------------------------------|----------------------------------|
|                                             | $n$ (%) <sup>*</sup>                       | $n$ (%) <sup>*</sup>                    |                                  |
| Preoperative opioid use†                    |                                            |                                         |                                  |
| Naïve                                       | 13,541 (74.6)                              | 23,324 (76.8)                           | 2.6                              |
| Exposed                                     | 4,142 (22.8)                               | 6,405 (21.1)                            | 2.3                              |
| Tolerant                                    | 463 (2.6)                                  | 648 (2.1)                               | 3.1                              |
| Preoperative drug use                       |                                            |                                         |                                  |
| Benzodiazepine                              | 1,470 (8.1)                                | 2,441 (8.0)                             | 0.3                              |
| Tetrahydrocannabinol                        | 49 (0.3)                                   | 99 (0.3)                                | 0                                |
| Demographics                                |                                            |                                         |                                  |
| Age, yr, mean $\pm$ SD                      | 51 $\pm$ 14)                               | 53 $\pm$ 14)                            | 10.4                             |
| Female                                      | 6,052 (33.4)                               | 10,601 (34.9)                           | 1.0                              |
| Rural                                       | 3,445 (19.0)                               | 3,844 (12.7)                            | 11.8                             |
| Neighborhood income quintile                | 2,962 (16.4)                               | 4,586 (15.1)                            | 2.4                              |
| 1                                           |                                            |                                         |                                  |
| 2                                           | 3,426 (18.9)                               | 5,460 (18.0)                            | 1.5                              |
| 3                                           | 3,733 (20.6)                               | 6,299 (20.7)                            | 0.1                              |
| 4                                           | 3,973 (22.0)                               | 6,748 (22.3)                            | 0.4                              |
| 5                                           | 4,050 (22.4)                               | 7,284 (24.0)                            | 2.0                              |
| Anesthesia type                             |                                            |                                         |                                  |
| General anesthesia (vs. sedation)           | 17,790 (98.0)                              | 26,582 (87.5)                           | 35.4                             |
| Surgery type                                |                                            |                                         |                                  |
| Total/partial arthroplasty                  | 101 (0.6)                                  | 233 (0.8)                               | 2.4                              |
| Arthroscopic shoulder surgery‡              | 4,111 (22.7)                               | 6,148 (20.2)                            | 3.5                              |
| Open shoulder surgery‡                      | 13,655 (75.3)                              | 23,872 (78.6)                           | 4.2                              |
| Other shoulder repair                       | 279 (1.5)                                  | 124 (0.4)                               | 11.1                             |
| Year of surgery                             |                                            |                                         |                                  |
| 2012                                        | 2,496 (7.3)                                | 3,454 (11.4)                            | 11.2                             |
| 2013                                        | 3,235 (17.8)                               | 5,075 (16.7)                            | 1.9                              |
| 2014                                        | 3,279 (18.1)                               | 5,174 (17.0)                            | 1.9                              |
| 2015                                        | 3,192 (17.6)                               | 5,369 (17.7)                            | 0.2                              |
| 2016                                        | 3,035 (16.7)                               | 5,506 (18.1)                            | 2.4                              |
| 2017                                        | 2,909 (16.0)                               | 5,799 (19.1)                            | 5.3                              |
| Healthcare resource use                     |                                            |                                         |                                  |
| Hospitalization in the last year            | 991 (5.5)                                  | 1,438 (4.7)                             | 3.3                              |
| Emergency department visit in the last year | 8,482 (46.7)                               | 12,155 (40.0)                           | 1.8                              |
| Resource utility band                       |                                            |                                         |                                  |
| 0                                           | 25 (0.1)                                   | 4 (0.0)                                 | 4.5                              |
| 1                                           | 301 (1.7)                                  | 383 (1.3)                               | 3.2                              |
| 2                                           | 1,957 (10.8)                               | 2,770 (9.1)                             | 4.4                              |
| 3                                           | 11,978 (66.0)                              | 20,164 (66.4)                           | 0.3                              |
| 4                                           | 2,863 (15.8)                               | 5,312 (17.5)                            | 3.1                              |
| 5                                           | 1,022 (5.6)                                | 1,744 (5.7)                             | 0.4                              |

(Continued)

Table 1. (Continued)

|                                       | No Peripheral Nerve Block (n = 18,146) | Peripheral Nerve Block (n = 30,377) | Absolute Standardized Difference |
|---------------------------------------|----------------------------------------|-------------------------------------|----------------------------------|
|                                       | n (%)*                                 | n (%)*                              |                                  |
| Comorbidities                         |                                        |                                     |                                  |
| ASA score < 3                         | 12,118 (66.8)                          | 19,073 (62.8)                       | 2.5                              |
| Cerebrovascular disease               | 55 (0.3)                               | 87 (0.3)                            | 0.3                              |
| Chronic renal disease                 | 29 (0.2)                               | 29 (0.2)                            | 1.8                              |
| Dialysis                              | 13 (0.1)                               | 16 (0.1)                            | 0.8                              |
| Dementia                              | 0                                      | 0                                   |                                  |
| Primary malignancy                    | 121 (0.7)                              | 145 (0.5)                           | 2.5                              |
| Metastatic solid tumor                | 13 (0.1)                               | 22 (0.1)                            | 0.0                              |
| Peripheral vascular disease           | 27 (0.1)                               | 64 (0.2)                            | 1.5                              |
| History of peptic ulcer disease       | 23 (0.1)                               | 39 (0.1)                            | 0.0                              |
| Liver disease                         | 31 (0.2)                               | 31 (0.1)                            | 1.9                              |
| Rheumatologic disease                 | 26 (0.1)                               | 38 (0.1)                            | 0.5                              |
| Hemiplegia or paraplegia              | 17 (0.1)                               | 11 (0)                              | 2.3                              |
| Atrial arrhythmia                     | 70 (0.4)                               | 123 (0.4)                           | 0.3                              |
| History of venous thromboembolism     | 12 (0.1)                               | 18 (0.1)                            | 0.3                              |
| History of heart failure              | 246 (1.4)                              | 404 (1.3)                           | 0.2                              |
| History of hypertension               | 6,063 (33.4)                           | 10,966 (36.1)                       | 1.7                              |
| History of diabetes mellitus          | 2,640 (14.5)                           | 4,644 (15.3)                        | 1.5                              |
| Chronic obstructive pulmonary disease | 2,292 (12.6)                           | 3,744 (12.3)                        | 0.7                              |
| Asthma                                | 3,357 (18.5)                           | 5,497 (18.1)                        | 0.7                              |
| Myocardial infarction                 | 309 (1.7)                              | 558 (1.8)                           | 1.0                              |
| Cardiac valvular disease              | 21 (0.1)                               | 38 (0.1)                            | 0.3                              |
| Disease of the pulmonary circulation  | 21 (0.1)                               | 45 (0.1)                            | 0.9                              |
| Coagulopathy                          | 24 (0.1)                               | 28 (0.1)                            | 1.2                              |
| Obesity                               | 124 (0.7)                              | 204 (0.7)                           | 0.1                              |
| Weight loss                           | 10 (0.1)                               | 4 (0.0)                             | 2.3                              |
| Blood loss anemia                     | 125 (0.7)                              | 194 (0.6)                           | 0.6                              |
| Deficiency anemia                     | 6 (0.0)                                | 16 (0.0)                            | 0.9                              |
| Alcohol abuse                         | 98 (0.5)                               | 100 (0.3)                           | 3.2                              |
| Drug abuse                            | 33 (0.2)                               | 37 (0.1)                            | 1.5                              |
| Psychosis                             | 4 (0.0)                                | 8 (0.0)                             | 0.3                              |
| Depression                            | 58 (0.3)                               | 110 (0.4)                           | 0.7                              |
| Frailty                               | 247 (1.4)                              | 367 (1.2)                           | 1.3                              |

\*Unless otherwise specified. †Modified O-NET criteria as opioid-naïve (N), no history of opioid use in the 90 days before surgery; opioid-exposed (E), any opioid exposure less than 60 mg morphine equivalent dose per day within 90 days preoperatively; opioid-tolerant (T), a dose of 60 mg morphine equivalent dose per day or above in the 90 days before surgery.

‡Joint, ligament, or rotator cuff.

ASA, American Society of Anesthesiologists.

our full cohort). There were 487 (4.9%) patients who had persistent postoperative opioid prescription fulfillment. Within the matched cohort, the presence of a peripheral nerve block was not associated with a statistically significant decrease in the odds of persistent postoperative opioid prescription fulfillment (odds ratio = 0.85; 95% CI, 0.71 to 1.02;  $P = 0.087$ ). Examining the coarsened exact match analysis by opioid-naïve and opioid-exposed groups, we found no statistically significant difference between patients who received a peripheral nerve block compared to those who did not receive a peripheral nerve block (table 3).

In the full cohort, we compared no peripheral nerve block (reference category) *versus* single-shot peripheral nerve block and catheter peripheral nerve block. The presence of a catheter was not associated with decreased adjusted odds of persistent postoperative opioid prescription fulfillment (adjusted odds ratio = 1.00; 95% CI, 0.86 to 1.17;  $P = 0.974$ ), whereas there was a statistically

significant decreased adjusted odds of persistent postoperative opioid prescription fulfillment in the single-shot peripheral nerve block group (adjusted odds ratio = 0.90; 95% CI, 0.83 to 0.97;  $P = 0.007$ ) compared with those who did not receive a nerve block. See table 4 for further sensitivity analyses within the opioid exposure groups. When we added our prespecified interaction terms into the model, we found that sex (interaction  $P = 0.18$ ), depression (interaction  $P = 0.21$ ), and drug abuse (interaction  $P = 0.20$ ) did not significantly modify the association of peripheral nerve block with persistent postoperative opioid prescription fulfillment. We repeated our analysis excluding patients with missing hospital data (7% of the cohort excluded) and found similar differences in the adjusted odds of persistent postoperative opioid prescription fulfillment compared with our primary analysis (adjusted odds ratio = 0.91; 95% CI, 0.84 to 0.98; Supplemental Digital Content 3, <http://links.lww.com/ALN/C679>).

## Post Hoc and Reviewer-requested Analysis

Our analysis was repeated using a second definition of persistent postoperative opioid prescription fulfillment (patients with more than 1 opioid prescription within 1 to 90 days after surgery and [a] more than 10 opioid prescriptions or [b] a 120-day supply of opioids within 91 to 365 days after surgery). Using this definition, there were 6,304 (13%) patients who had persistent postoperative opioid prescription fulfillment, and of those who received a peripheral nerve block, 3,769 (12%) went on to have persistent

**Table 2.** Fully Adjusted Regression Model for Risk of Persistent Postoperative Opioid Prescription Fulfillment Using the Modified Consensus Definition\* in the Full Cohort

| Covariate                                              | Odds Ratio | 95% CI     |
|--------------------------------------------------------|------------|------------|
| Peripheral nerve block (vs. none)                      | 0.90       | 0.83–0.97  |
| Preoperative opioid prescription fulfillment†          |            |            |
| Naive                                                  | Reference  |            |
| Exposed                                                | 8.0        | 7.3–8.8    |
| Tolerant                                               | 9.4        | 8.0–11.2   |
| Preoperative drug use                                  |            |            |
| Benzodiazepine (vs. none)                              | 6.6        | 6.0–7.3    |
| Tetrahydrocannabinol (vs. none)                        | 7.3        | 4.4–12.6   |
| Demographics                                           |            |            |
| Age linear segment                                     |            |            |
| Restricted cubic spline segment 1                      | 1.04       | 1.03–1.05  |
| Restricted cubic spline segment 2                      | 0.96       | 0.93–0.98  |
| Restricted cubic spline segment 3                      | 1.01       | 0.78–1.29  |
| Restricted cubic spline segment 4                      | 1.36       | 0.81–2.31  |
| Female (vs. male)                                      | 1.01       | 0.95–1.07  |
| Rural (vs. not rural)                                  | 1.00       | 0.92–1.09  |
| Neighborhood income quintile                           |            |            |
| 1 (lowest)                                             | Reference  |            |
| 2                                                      | 0.93       | 0.85–1.02  |
| 3                                                      | 0.88       | 0.81–0.96  |
| 4                                                      | 0.84       | 0.76–0.93  |
| 5 (highest)                                            | 0.75       | 0.69–0.83  |
| Anesthesia type                                        |            |            |
| General anesthesia (vs. sedation)                      | 0.91       | 0.78–1.06  |
| Surgery type                                           |            |            |
| Total/partial arthroplasty                             | Reference  |            |
| Arthroscopic shoulder surgery‡                         | 1.42       | 0.87–2.31  |
| Open shoulder surgery‡                                 | 1.33       | 0.84–2.09  |
| Other shoulder repair                                  | 1.22       | 0.66–2.28  |
| Year of surgery                                        |            |            |
| 2012                                                   | Reference  |            |
| 2013                                                   | 0.94       | 0.83–1.07  |
| 2014                                                   | 0.89       | 0.81–0.98  |
| 2015                                                   | 0.84       | 0.75–0.94  |
| 2016                                                   | 0.81       | 0.71–0.91  |
| 2017                                                   | 0.81       | 0.72–0.91  |
| Healthcare resource use                                |            |            |
| Hospitalization in the last year (vs. none)            | 0.79       | 0.67–0.92  |
| Emergency department visit in the last year (vs. none) | 0.81       | 0.75–0.87  |
| Resource utility band                                  |            |            |
| 0 (Reference)                                          | Reference  | Reference  |
| 1                                                      | 2.55       | 0.62–10.34 |
| 2                                                      | 2.18       | 0.55–8.68  |
| 3                                                      | 2.53       | 0.65–9.87  |
| 4                                                      | 3.39       | 0.86–13.27 |
| 5                                                      | 3.22       | 0.80–13.03 |

(Continued)

**Table 2.** (Continued)

| Covariate                             | Odds Ratio | 95% CI     |
|---------------------------------------|------------|------------|
| Comorbidities                         |            |            |
| ASA score < 3                         | 1.39       | 1.29–1.49  |
| Cerebrovascular disease               | 1.53       | 0.98–2.39  |
| Chronic renal disease                 | 0.75       | 0.341–1.67 |
| Dialysis                              | 0.80       | 0.258–2.45 |
| Dementia                              | Omitted    | Omitted    |
| Primary malignancy                    | 0.71       | 0.48–1.03  |
| Metastatic solid tumor                | 0.95       | 0.334–2.70 |
| Peripheral vascular disease           | 1.15       | 0.63–2.10  |
| History of peptic ulcer disease       | 1.04       | 0.53–2.05  |
| Liver disease                         | 0.90       | 0.378–2.12 |
| Rheumatologic disease                 | 1.16       | 0.57–2.36  |
| Hemiplegia or paraplegia              | 0.64       | 0.142–2.86 |
| Atrial arrhythmia                     | 1.32       | 0.88–1.99  |
| History of venous thromboembolism     | 0.76       | 0.26–2.27  |
| History of heart failure              | 1.34       | 1.11–1.61  |
| History of hypertension               | 1.17       | 1.09–1.26  |
| History of diabetes mellitus          | 1.05       | 0.97–1.14  |
| Chronic obstructive pulmonary disease | 1.34       | 1.23–1.45  |
| Asthma                                | 1.16       | 1.07–1.26  |
| Myocardial infarction                 | 0.90       | 0.73–1.11  |
| Cardiac valvular disease              | 0.45       | 0.183–1.10 |
| Disease of the pulmonary circulation  | 1.04       | 0.52–2.06  |
| Coagulopathy                          | 1.37       | 0.66–2.83  |
| Obesity                               | 1.28       | 0.99–1.66  |
| Weight loss                           | 0.70       | 0.160–3.09 |
| Blood loss anemia                     | 0.90       | 0.64–1.26  |
| Deficiency anemia                     | 1.74       | 0.75–4.03  |
| Alcohol abuse                         | 0.92       | 0.61–1.37  |
| Drug abuse                            | 2.68       | 1.20–5.99  |
| Psychosis                             | 0.294      | 0.043–2.03 |
| Depression                            | 2.31       | 1.40–3.80  |
| Frailty                               | 0.89       | 0.70–1.12  |

\*Persistent postoperative opioid prescription fulfillment as defined in Materials and Methods. †Modified O-NET criteria as opioid-naïve (N), no history of opioid use in the 90 days before surgery; opioid-exposed (E), any opioid exposure less than 60 mg morphine equivalent dose per day within 90 days preoperatively; opioid-tolerant (T), a dose of 60 mg morphine equivalent dose per day or above in the 90 days before surgery. ‡Joint, ligament, tendon.

ASA, American Society of Anesthesiologists.

postoperative opioid use compared to 2,535 (14%) patients who did not receive a peripheral nerve block (adjusted odds ratio = 0.85; 95% CI, 0.78 to 0.93;  $P < 0.001$ ) with this definition (Supplemental Digital Content 4, <http://links.lww.com/ALN/C680>).

The anesthetic technique and the type of surgical procedure were also examined (see table 4 with these *post hoc* reviewer-requested analyses). When we added interaction terms into the model, we found that neither preoperative opioid exposure (interaction  $P = 0.33$ ) nor the receipt of a catheter (interaction  $P = 0.18$ ) significantly modified the association of peripheral nerve block with persistent postoperative opioid prescription fulfillment.

## Discussion

In this retrospective, population-based cohort study examining nerve blocks in 48,523 shoulder surgery patients in



**Table 3.** Association of Peripheral Nerve Blocks with Persistent Postoperative Opioid Prescription Fulfillment\* in Ambulatory Shoulder Surgery

|                                                 | Persistent Postoperative Opioid, n (%) | No Peripheral Nerve Block              |               | Peripheral Nerve Block                 |               | Unadjusted Odds Ratio (95% CI) | P Value        | Adjusted† Odds Ratio (95% CI) | P Value |
|-------------------------------------------------|----------------------------------------|----------------------------------------|---------------|----------------------------------------|---------------|--------------------------------|----------------|-------------------------------|---------|
|                                                 |                                        | Persistent Postoperative Opioid, n (%) |               | Persistent Postoperative Opioid, n (%) |               |                                |                |                               |         |
|                                                 |                                        | Total, n                               | Opioid, n (%) | Total, n                               | Opioid, n (%) |                                |                |                               |         |
| Primary analysis                                |                                        |                                        |               |                                        |               |                                |                |                               |         |
| Full cohort, n = 48,523                         | 8,229 (17.0)                           | 18,146                                 | 3,221 (17.8)  | 30,377                                 | 5,008 (16.5)  | 0.91 (0.87–0.96)               | < 0.001        | 0.90 (0.83–0.97)              | 0.007   |
| Preoperative opioid use                         |                                        |                                        |               |                                        |               |                                |                |                               |         |
| Naïve, n = 36,865                               | 2,862 (7.8)                            | 13,541                                 | 1,054 (7.8)   | 23,324                                 | 1,808 (8.4)   | 1.00 (0.92–1.08)               | 0.912          | 0.95 (0.86–1.04)              | 0.266   |
| Exposed, n = 10,547                             | 4,690 (44.5)                           | 4,142                                  | 1,890 (45.6)  | 6,405                                  | 2,800 (43.7)  | 0.93 (0.86–1.00)               | 0.053          | 0.86 (0.77–0.96)              | 0.006   |
| Tolerant, n = 1,111                             | 677 (60.9)                             | 463                                    | 277 (59.8)    | 648                                    | 400 (61.7)    | 1.08 (0.85–1.38)               | 0.522          | 1.03 (0.78–1.36)              | 0.809   |
| Sensitivity analysis (coarsened exact matching) |                                        |                                        |               |                                        |               |                                |                |                               |         |
| Full cohort, n = 9,877                          | 487 (4.9)                              | 4,454                                  | 237 (5.3)     | 5,423                                  | 250 (4.6)     | Not applicable                 | Not applicable | 0.85 (0.71–1.02)              | 0.087   |
| Preoperative opioid use                         |                                        |                                        |               |                                        |               |                                |                |                               |         |
| Naïve, n = 9,380                                | 309 (3.3)                              | 4,230                                  | 152 (3.6)     | 5,150                                  | 157 (3.0)     | Not applicable                 | Not applicable | 0.84 (0.67–1.05)              | 0.130   |
| Exposed, n = 497                                | 118 (23.7)                             | 224                                    | 85 (37.9)     | 273                                    | 93 (34.1)     | Not applicable                 | Not applicable | 0.85 (0.59–1.23)              | 0.394   |

P &lt; 0.05 is statistically significant.

\*Consensus definition of persistent postoperative opioid prescription fulfillment. †Variables included in the model are outlined in table 1.

Ontario, Canada, the receipt of a peripheral nerve block did not appear to be associated with a reduction in persistent postoperative opioid prescription fulfillment. Although our primary analysis demonstrated a statistically significant association (adjusted odds ratio = 0.90; 95% CI, 0.83 to 0.97;  $P = 0.007$ ), the clinical significance of this association is unknown given the retrospective nature of this study. In addition, sensitivity and secondary analyses did not support a consistent relationship between nerve blocks and lower rate of postoperative opioid prescription fulfillment.

Although a recent consensus statement recommends regional anesthesia techniques be used to reduce opioid consumption after surgery,<sup>35</sup> available evidence is sparse and conflicting. A Cochrane review demonstrated that the use of regional anesthesia can result in reduced chronic pain in thoracotomy and breast cancer surgery,<sup>36</sup> although the methodologic quality of this evidence is intermediate as conclusions were based on a few small randomized controlled studies.<sup>32,37</sup> Mueller *et al.*<sup>15</sup> conducted a retrospective study on patients undergoing total shoulder arthroplasty and found no association in the risk of persistent opioid use between postoperative days 91 and 365 (adjusted odds ratio = 0.997; 97.5% CI, 0.875 to 1.14;  $P = 0.95$ ). They also found that the association was not modified with preoperative opioid use. Although our study is also retrospective, it differs from that of Mueller *et al.* in a number of ways. First, Mueller *et al.* utilized billing codes that were not validated for their definition of the peripheral nerve block, whereas we utilized a validated peripheral nerve block exposure code for our study. Second, their population was restricted to patients with private insurance who were less than 65 yr old. In contrast, we were able to evaluate the association of peripheral nerve blocks with persistent postoperative opioid prescription fulfillment across all adult patients in a universal health care system over 6 yr using contemporary data.

We also examined the association of peripheral nerve blocks and persistent postoperative opioid prescription fulfillment by preoperative opioid use status (*e.g.*, opioid-naïve, -exposed, or -tolerant) as defined *a priori* in our protocol. In opioid-exposed patients ( $n = 10,547$ ), the receipt of a peripheral nerve block was associated with reduced odds of persistent postoperative opioid prescription fulfillment in our primary analysis (adjusted odds ratio = 0.86; 95% CI, 0.77 to 0.96;  $P = 0.006$ ), but this association did not persist in the coarsened exact matching sensitivity analysis (which estimates the average treatment effect in the treated, reflecting that the matched group that received peripheral nerve blocks ended up with an increase in opioid fulfillment, similar to those patients without blocks). In addition, we did not find a difference in the number or quantity of immediate postoperative opioid prescriptions between exposure groups in the 14 days after surgery, which demonstrates that the receipt of a peripheral nerve block did not modify the amount of opioids available for patients in the immediate postoperative period. Therefore, we cannot conclude that

**Table 4.** Sensitivity Analyses Using Multivariable Regression Models

| Cohort                      | Exposure Subgroup                                      | Persistent Postoperative Opioid*<br>n (%) | Adjusted Odds Ratio (95% CI)† | P Value |
|-----------------------------|--------------------------------------------------------|-------------------------------------------|-------------------------------|---------|
| Full (n = 48,523)           | Peripheral nerve block type                            |                                           |                               |         |
|                             | No peripheral nerve block (n = 18,146)                 | 3,221 (17.8)                              | Reference                     |         |
|                             | Peripheral nerve block (single shot; n = 29,008)       | 4,784 (16.5)                              | 0.90 (0.83–0.97)              | 0.007   |
|                             | Peripheral nerve block (catheter; n = 1,369)           | 224 (16.3)                                | 1.00 (0.86–1.17)              | 0.974   |
| Opioid-naïve (n = 36,865)   | Peripheral nerve block type                            |                                           |                               |         |
|                             | No peripheral nerve block (n = 13,541)                 | 1,054 (7.8)                               | Reference                     |         |
|                             | Peripheral nerve block (single shot; n = 22,224)       | 1,700 (7.6)                               | 0.94 (0.85–1.03)              | 0.173   |
|                             | Peripheral nerve block (catheter; n = 1,100)           | 108 (9.8)                                 | 1.26 (0.96–1.67)              | 0.098   |
| Opioid-exposed (n = 10,547) | Peripheral nerve block type                            |                                           |                               |         |
|                             | No peripheral nerve block (n = 4,142)                  | 1,890 (45.6)                              | Reference                     |         |
|                             | Peripheral nerve block (single shot; n = 6,165)        | 2,697 (43.7)                              | 0.86 (0.77–0.96)              | 0.008   |
|                             | Peripheral nerve block (catheter; n = 240)             | 103 (42.9)                                | 0.82 (0.61–1.10)              | 0.188   |
| Opioid-tolerant (n = 1,111) | Peripheral nerve block type                            |                                           |                               |         |
|                             | No peripheral nerve block (n = 463)                    | 277 (59.8)                                | Reference                     |         |
|                             | Peripheral nerve block (single shot; n = 619)          | 387 (62.5)                                | 0.82 (0.81–1.42)              | 0.618   |
|                             | Peripheral nerve block (catheter; n = 29)              | 13 (44.8)                                 | 0.46 (0.26–0.79)              | 0.005   |
| Full (n = 48,523)           | Anesthetic type                                        |                                           |                               |         |
|                             | General anesthesia (n = 17,790)                        | 3,150 (17.7)                              | Reference                     |         |
|                             | Peripheral nerve block/general anesthesia (n = 26,582) | 4,409 (16.6)                              | 0.90 (0.84–0.98)              | 0.012   |
|                             | Peripheral nerve block with sedation (n = 3,795)       | 599 (15.8)                                | 0.97 (0.83–1.14)              | 0.719   |
|                             | Sedation with local (n = 356)                          | 71 (19.9)                                 | 1.34 (0.98–1.80)              | 0.071   |
| Full (n = 48,523)           | Surgery type                                           |                                           |                               |         |
|                             | Total/partial arthroplasty (n = 334)                   | 83 (24.9)                                 | Reference                     | 0.156   |
|                             | Arthroscopic shoulder procedure (n = 10,259)           | 1,984 (19.3)                              | 1.42 (0.87–2.31)              |         |
|                             | Open shoulder procedure (n = 37,527)                   | 6,101 (16.3)                              | 1.33 (0.84–2.09)              | 0.224   |
|                             | Other procedure (n = 403)                              | 61 (15.1)                                 | 1.22 (0.66–2.28)              | 0.525   |

*P* < 0.05 is statistically significant.

\*Consensus definition of persistent postoperative opioid. †Variables included in the adjusted model include all variables which were included in the primary analysis model (table 2).

opioid-exposed patients benefit to a greater extent than opioid-naïve patients with the placement of a peripheral nerve block.

In our *post hoc* analysis, we examined a second commonly used definition for persistent postoperative opioid prescription fulfillment (patients with more than 1 opioid prescription within 1 to 90 days after surgery and [a] more than 10 opioid prescriptions or [b] a 120-day supply of opioids within 91 to 365 days after surgery). Using this definition with a more restrictive criterion than the consensus definition in the primary analysis, there was a statistically significant association between peripheral nerve block receipt with reduced opioid prescription fulfillment. Again, there was lack of consistency of these results within the matched cohort, so these *post hoc* results require cautious interpretation.

Prespecified sensitivity analyses suggest that the use of a catheter techniques in the full population (n = 48,523) were not associated with a decrease in persistent opioid prescription fulfillment. In a small number of opioid-tolerant individuals (n = 1,111), the use of a catheter in 29 patients was associated with reduced odds of persistent postoperative opioid prescription fulfillment (adjusted odds ratio = 0.46; 95% CI, 0.26 to 0.79). Given the small sample

size and exploratory nature of this finding, further study is required to examine the potential long-term benefit for catheter-based peripheral nerve block techniques. Although we found that patients who received a peripheral nerve block may require fewer oral morphine equivalents in the year after surgery than those who did not, this finding was not robust to different modeling assumptions. Last, in our model, it appeared that the year of surgery may have modified persistent postoperative opioid prescription fulfillment, with less persistent postoperative opioid use seen in more recent years. This is an encouraging finding, as it is consistent with current public health messaging in an attempt to reduce opioids for the management of chronic pain.<sup>38</sup>

## Limitations

Given that this is a retrospective cohort study using administrative data, our findings are at risk of different forms of bias. Specifically, misclassification and confounding bias are key considerations when using administrative data. We used validated measures of exposure to attempt to decrease the risk of misclassification. Our outcome was defined using a consensus best practice definition applied to pharmacy data, which suggests a low likelihood of outcome misclassification.<sup>6</sup> We additionally demonstrated

consistency over two different definitions of postoperative opioid prescription fulfillment in our *post hoc* analysis. Even so, as opioid prescription fulfillment was used as our outcome, it is possible that the opioid prescription fulfillment may be over- or underestimated if a portion of the prescription time frame fell outside our time frame definition. Furthermore, reflecting the pragmatic intentions of our data and design, we are only able to examine whether a peripheral nerve block was provided, but cannot evaluate whether it worked, what technique was used, or which medications were administered at the time of surgery. Similarly, our data provide quantities of opioids dispensed, but not whether they were consumed. In addition, we do not have data specific to reported pain outcomes between the different exposure groups, so we cannot comment on the impact of peripheral nerve blocks on important patient outcomes (e.g., pain-specific outcomes and side effects, opioid side effects). Regarding the effect modification of opioid exposure subgroups, our model may have been underpowered to detect a statistically significant effect in our model. Confounding and indication bias were also possible, although the baseline balance between groups was reassuring, robust adjustment was made for measurable covariates, and primary findings were consistent across different approaches to analysis. As this study was conducted in the province of Ontario, the findings may not generalize to other jurisdictions. In addition, our study was limited to ambulatory procedures, so it may not be generalizable to inpatient shoulder surgeries.

## Conclusions

Perioperative interventions that decrease chronic postoperative opioid use are needed. Shoulder surgery is a common, painful procedure for which opioids are routinely dispensed. This retrospective observational study suggests that peripheral nerve blocks do not contribute to reducing persistent postoperative opioid prescription fulfillment in patients undergoing ambulatory shoulder surgery.

## Research Support

Dr. Hamilton receives salary support from the Ottawa Hospital Department of Anesthesiology and Pain Medicine, Ottawa, Ontario, Canada. Dr. McIsaac receives salary support from the Ottawa Hospital Department of Anesthesiology and Pain Medicine and a Clinical Research Chair at the University of Ottawa, Ottawa, Ontario, Canada, and is supported by the Canadian Anesthesiologists' Society (Toronto, Ontario, Canada) Career Scientist Award. Dr. Bromley receives salary support from the Ottawa Hospital Department of Anesthesiology and Pain Medicine.

## Competing Interests

Dr. Bromley declares personal fees from Indivior Canada Ltd., Quebec, Canada (Speakers Bureau), outside the

submitted work. Dr. Bromley has also received funds from Master Clinician Alliance, London, Ontario, Canada, outside the submitted work. The other authors declare no competing interests.

## Correspondence

Address correspondence to Dr. McIsaac: Department of Anesthesiology and Pain Medicine, 1053 Carling Avenue, Ottawa, Ontario K1Y 4E9, Canada. [dmcisaac@toh.on.ca](mailto:dmcisaac@toh.on.ca). This article may be accessed for personal use at no charge through the Journal Web site, [www.anesthesiology.org](http://www.anesthesiology.org).

## References

1. Leider HL, Dhaliwal J, Davis EJ, Kulakodlu M, Buikema AR: Healthcare costs and nonadherence among chronic opioid users. *Am J Manag Care* 2011; 17:32–40
2. Hedegaard H, Miniño AM, Warner M: Drug overdose deaths in the United States, 1999–2017. *NCHS Data Brief* 2018;1–8. Available at: <http://www.ncbi.nlm.nih.gov/pubmed/30500323>. Accessed April 12, 2020.
3. Finney FT, Gossett TD, Hu HM, Waljee JF, Brummett CM, Walton DM, Talusan PG, Holmes JR: Rate of opioid prescriptions for patients with acute ankle sprain. *Ann Intern Med* 2019; 171:441–3
4. Donohue JM, Kennedy JN, Seymour CW, Girard TD, Lo-Ciganic WH, Kim CH, Marroquin OC, Moyo P, Chang CH, Angus DC: Patterns of opioid administration among opioid-naïve inpatients and associations with postdischarge opioid use: a cohort study. *Ann Intern Med* 2019; 171:81–90
5. Calcaterra SL, Yamashita TE, Min SJ, Keniston A, Frank JW, Binswanger IA: Opioid prescribing at hospital discharge contributes to chronic opioid use. *J Gen Intern Med* 2016; 31:478–85
6. Kent ML, Hurley RW, Oderda GM, Gordon DB, Sun E, Mythen M, Miller TE, Shaw AD, Gan TJ, Thacker JKM, McEvoy MD; POQI-4 Working Group: American Society for Enhanced Recovery and Perioperative Quality Initiative-4 joint consensus statement on persistent postoperative opioid use: Definition, incidence, risk factors, and health care system initiatives. *Anesth Analg* 2019; 129:543–52
7. Brat GA, Agniel D, Beam A, Yorkgitis B, Bicket M, Homer M, Fox KP, Knecht DB, McMahon-Walraven CN, Palmer N, Kohane I: Postsurgical prescriptions for opioid naïve patients and association with overdose and misuse: Retrospective cohort study. *BMJ* 2018; 360:j5790
8. Jivraj NK, Raghavji F, Bethell J, Wijesundera DN, Ladha KS, Bateman BT, Neuman MD, Wunsch H: Persistent postoperative opioid use: A systematic literature search of definitions and population-based cohort study. *ANESTHESIOLOGY* 2020; 132:1528–39

9. Memtsoudis SG, Ma Y, Swamidoss CP, Edwards AM, Mazumdar M, Liguori GA: Factors influencing unexpected disposition after orthopedic ambulatory surgery. *J Clin Anesth* 2012; 24:89–95
10. Gerbershagen HJ, Aduckathil S, van Wijck AJ, Peelen LM, Kalkman CJ, Meissner W: Pain intensity on the first day after surgery: A prospective cohort study comparing 179 surgical procedures. *ANESTHESIOLOGY* 2013; 118:934–44
11. Cozowicz C, Poeran J, Memtsoudis SG: Epidemiology, trends, and disparities in regional anaesthesia for orthopaedic surgery. *Br J Anaesth* 2015; 115(suppl 2):ii57–67
12. Danninger T, Stundner O, Rasul R, Brummett CM, Mazumdar M, Gerner P, Memtsoudis SG: Factors associated with hospital admission after rotator cuff repair: The role of peripheral nerve blockade. *J Clin Anesth* 2015; 27:566–73
13. Hamilton GM, Lalu MM, Ramlogan R, Bryson GL, Abdallah FW, McCartney CJL, McIsaac DI: A population-based comparative effectiveness study of peripheral nerve blocks for hip fracture surgery. *ANESTHESIOLOGY* 2019; 131:1025–35
14. Hamilton GM, Ramlogan R, Lui A, McCartney CJL, Abdallah F, McVicar J, McIsaac DI: Peripheral nerve blocks for ambulatory shoulder surgery: A population-based cohort study of outcomes and resource utilization. *ANESTHESIOLOGY* 2019; 131:1254–63
15. Mueller KG, Memtsoudis SG, Mariano ER, Baker LC, Mackey S, Sun EC: Lack of association between the use of nerve blockade and the risk of persistent opioid use among patients undergoing shoulder arthroplasty: Evidence from the Marketscan Database. *Anesth Analg* 2017; 125:1014–20
16. Atchabahian A, Schwartz G, Hall CB, Lajam CM, Andreae MH: Regional analgesia for improvement of long-term functional outcome after elective large joint replacement. *Cochrane Database Syst Rev* 2015; 8:CD010278
17. Warrender WJ, Syed UAM, Hammoud S, Emper W, Ciccotti MG, Abboud JA, Freedman KB: Pain management after outpatient shoulder arthroscopy: A systematic review of randomized controlled trials. *Am J Sports Med* 2017; 45:1676–86
18. Brummett CM, Waljee JF, Goesling J, Moser S, Lin P, Englesbe MJ, Bohnert ASB, Kheterpal S, Nallamothu BK: New persistent opioid use after minor and major surgical procedures in US adults. *JAMA Surg* 2017; 152:e170504
19. Austin PC, Walraven CW: The mortality risk score and the ADG score: Two points-based scoring systems for the Johns Hopkins aggregated diagnosis groups to predict mortality in a general adult population cohort in Ontario, Canada. *Med Care* 2011; 49:940–7
20. The Johns Hopkins ACG System: ACG System Technical Reference Guide, version 11.0. Baltimore, Johns Hopkins, 2014. Available at: <http://acg.jhsph.org>. Accessed March 20, 2020.
21. Gershon AS, Wang C, Guan J, Vasilevska-Ristovska J, Cicutto L, To T: Identifying patients with physician-diagnosed asthma in health administrative databases. *Can Respir J* 2009; 16:183–8
22. Gershon AS, Wang C, Guan J, Vasilevska-Ristovska J, Cicutto L, To T: Identifying individuals with physician diagnosed COPD in health administrative databases. *COPD* 2009; 6:388–94
23. Hux JE, Ivis F, Flintoft V, Bica A: Diabetes in Ontario: Determination of prevalence and incidence using a validated administrative data algorithm. *Diabetes Care* 2002; 25:512–6
24. Tu K, Mitiku T, Guo H, Lee DS, Tu JV: Myocardial infarction and the validation of physician billing and hospitalization data using electronic medical records. *Chronic Dis Can* 2010; 30:141–6
25. Schultz SE, Rothwell DM, Chen Z, Tu K: Identifying cases of congestive heart failure from administrative data: A validation study using primary care patient records. *Chronic Dis Inj Can* 2013; 33:160–6
26. Tu K, Campbell NR, Chen ZL, Cauch-Dudek KJ, McAlister FA: Accuracy of administrative databases in identifying patients with hypertension. *Open Med* 2007; 1:e18–26
27. Quan H, Sundararajan V, Halfon P, Fong A, Burnand B, Luthi JC, Saunders LD, Beck CA, Feasby TE, Ghali WA: Coding algorithms for defining comorbidities in ICD-9-CM and ICD-10 administrative data. *Med Care* 2005; 43:1130–9
28. Austin PC: Using the standardized difference to compare the prevalence of a binary variable between two groups in observational research. *Commun Stat Simul Comput* 2009; 38:1228–34
29. Altman DG, Deeks JJ, Sackett DL: Odds ratios should be avoided when events are common. *BMJ* 1998; 317:1318
30. Blackwell M, Iacus S, King G, Porro G: Coarsened exact matching in Stata. *Stata J* 2009; 9:524–46
31. Iacus SM, King G, Porro G: Multivariate matching methods that are monotonic imbalance bounding. *J Am Stat Assoc* 2011; 106:345–61
32. Sun EC, Bateman BT, Memtsoudis SG, Neuman MD, Mariano ER, Baker LC: Lack of association between the use of nerve blockade and the risk of postoperative chronic opioid use among patients undergoing total knee arthroplasty: Evidence from the Marketscan Database. *Anesth Analg* 2017; 125:999–1007
33. Sun EC, Darnall BD, Baker LC, Mackey S: Incidence of and risk factors for chronic opioid use among opioid-naïve patients in the postoperative period. *JAMA Intern Med* 2016; 176:1286–93
34. O'Connell C, Azad TD, Mittal V, Vail D, Johnson E, Desai A, Sun E, Ratliff JK, Veeravagu A: Preoperative depression, lumbar fusion, and opioid use: An assessment of



- postoperative prescription, quality, and economic outcomes. *Neurosurg Focus* 2018; 44:E5
35. Edwards DA, Hedrick TL, Jayaram J, Argoff C, Guler P, Holubar SD, Gan TJ, Mythen MG, Miller TE, Shaw AD, Thacker JKM, McEvoy MD; POQI-4 Working Group: American Society for Enhanced Recovery and Perioperative Quality Initiative joint consensus statement on perioperative management of patients on preoperative opioid therapy. *Anesth Analg* 2019; 129:553–66
  36. Andreae MH, Andreae DA: Local anaesthetics and regional anaesthesia for preventing chronic pain after surgery. *Cochrane Database Syst Rev* 2012; 10:CD007105
  37. Ladha KS, Paterno E, Liu J, Bateman BT: Impact of perioperative epidural placement on postdischarge opioid use in patients undergoing abdominal surgery. *ANESTHESIOLOGY* 2016; 124:396–403
  38. Dowell D, Haegerich TM, Chou R: CDC guideline for prescribing opioids for chronic pain – United States, 2016. *MMWR Recomm Rep* 2016; 65:1–49

## ANESTHESIOLOGY REFLECTIONS FROM THE WOOD LIBRARY-MUSEUM

### Skirting Male Chauvinism in Physician Training: Dr. Emily Blackwell and the Woman's Medical College

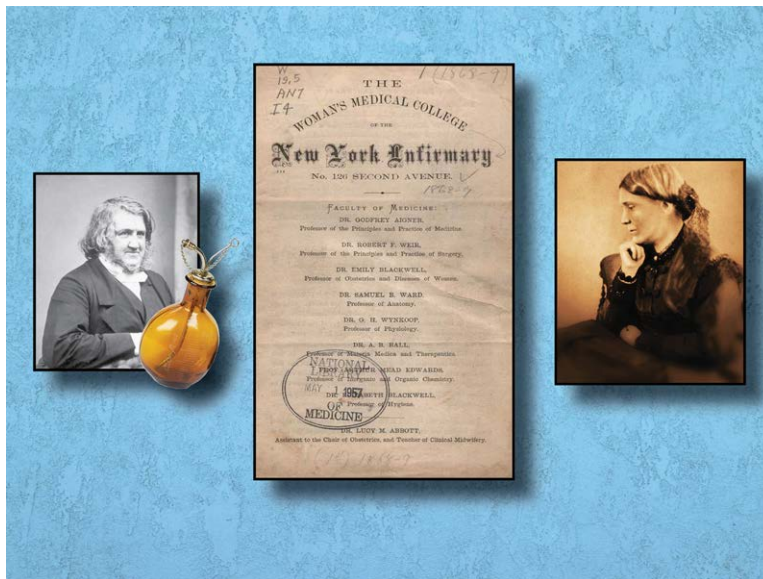

After overcoming great obstacles, Emily Blackwell, M.D. (1826 to 1910), the brilliant and bold younger sister of Elizabeth Blackwell, M.D., became the third woman to earn her medical degree in the United States. A month after her graduation in 1854, she boarded a transatlantic steamship to seek a training opportunity with Professor James Y. Simpson, renowned pioneer of chloroform anesthesia and Chair of Midwifery at the University of Edinburgh. To Emily's relief, Simpson welcomed her warmly and offered to help her achieve her goals. She marveled at his diagnostic acumen and skill with chloroform administration. However, Emily soon found herself *seeing* more than *doing*. Writing to sister Elizabeth, Emily voiced the hunger of countless women physicians who would follow: "The difficulties are by no means great if the places of study were open. Give me the opportunities [Simpson's] assistant has had. I would be more skillful than he is." The sisters Blackwell dreamed of a world in which women could reach their full professional potential. To that end, they founded their own Woman's Medical College of the New York Infirmary (est. 1868), which provided rigorous clinical training and "held open the door for women until broader gates...sw[a]ng wide for their admission." Once medical schools in the United States became coeducational, the Woman's Medical College would close. (Copyright © the American Society of Anesthesiologists' Wood Library-Museum of Anesthesiology.)

*Jane S. Moon, M.D., University of California, Los Angeles, California, and Melissa L. Coleman, M.D., Penn State College of Medicine, Hershey, Pennsylvania.*
